# Supplementary material for: Nanostructured manganese oxides exhibit facet-dependent oxidation capabilities
Source: Royal Society of Chemistry journal article supplement (doi:10.1039/d0en00958j), 2020-01-01
Supplement: d0en00958j1.pdf [file d0en00958j1.pdf]

## Supplementary Information

# Nanostructured Manganese Oxides Exhibit Facet-Dependent Oxidation Capabilities

*Di Fu<sup>†</sup>, Lin Duan<sup>\*†</sup>, Chuanjia Jiang<sup>†</sup>, Tong Zhang<sup>†</sup>, Wei Chen<sup>\*†</sup>*

<sup>†</sup> College of Environmental Science and Engineering, Ministry of Education Key Laboratory of Pollution Processes and Environmental Criteria, Tianjin Key Laboratory of Environmental Remediation and Pollution Control, Nankai University, 38 Tongyan Road, Tianjin 300350, China

Manuscript prepared for *Environmental Science: Nano*

\* Corresponding author: (Phone/fax) 86-22-85358169; (E-mail) [duanlin@nankai.edu.cn](mailto:duanlin@nankai.edu.cn),  
[chenwei@nankai.edu.cn](mailto:chenwei@nankai.edu.cn).

Number of pages: 13

Number of figures: 7

### **Synthesis of $\alpha$ -MnO<sub>2</sub> nanostructures**

The two  $\alpha$ -MnO<sub>2</sub> nanostructures were synthesized with methods modified from those reported by Rong et al.<sup>1</sup>  $\alpha$ -MnO<sub>2</sub>-100 was synthesized as follows: firstly, 40 mmol L<sup>-1</sup> of KMnO<sub>4</sub> and 10 mmol L<sup>-1</sup> of (NH<sub>4</sub>)<sub>2</sub>SO<sub>4</sub> were dissolved in 70 mL of deionized water under continuous magnetic stirring at room temperature for 30 min. The mixture solution was then transferred into a 100-mL Teflon-lined stainless-steel autoclave and maintained at 180 °C for 24 h. After the autoclave cooled naturally to room temperature, the dark brown precipitates were collected by centrifugation, then washed several times with deionized water, and finally dried at 60 °C.  $\alpha$ -MnO<sub>2</sub>-310 was synthesized similarly, except that (NH<sub>4</sub>)<sub>2</sub>C<sub>2</sub>O<sub>4</sub> was used instead of (NH<sub>4</sub>)<sub>2</sub>SO<sub>4</sub>.

### **Analysis of oxidation products of bisphenol A**

The aqueous solutions containing BPA oxidation products were filtrated through a 0.22- $\mu$ m membrane filter, and extracted by trichloroethane. The extracts were concentrated at room temperature ( $25.0 \pm 0.5$  °C), diluted to 1 mL with methanol, and then analyzed by UPLC-MS/MS equipped with an Acquity UPLC BEH C18 column (1.7  $\mu$ m, 2.1  $\times$  50 mm) (XEVO-TQS, Waters, USA). The mobile-phase was methanol with a flow rate of 0.45 mL/min. The mass spectrometer was operated in the  $m/z$  50-500 range for UPLC-MS/MS. The cone voltage was set to 40 V. The desolvation temperature and source temperature were 350 and 150 °C, respectively.

### **Density functional theory (DFT) calculation**

First-principles calculations were performed by employing the Vienna ab-initio simulation package (VASP). The core-valence interaction was represented by the projector-augmented wave (PAW) method.<sup>2, 3</sup> The cut-off energy was set at 450 eV for the plane-wave basis

restriction. The generalized gradient approximation (GGA) with the Perdew-Burke-Ernzerhof (PBE) was used to describe exchange-correlation functional. Local Hubbard parameter  $U$  correction was applied in the calculations with a  $U$  value of 5.2 for Mn.<sup>1</sup> The Brillouin-zone integration was sampled with the K-points according to the Monkhorst-Pack scheme for  $\alpha$ -MnO<sub>2</sub> surfaces. The energy criterion for convergence of the electron density was set at 10<sup>-5</sup> eV, and the force criterion was set at 0.05 eV/Å. A vacuum slab of 20 Å was applied for surface isolation to prevent interactions between two adjacent surfaces for all surface models. Three surface layers were relaxed and all other atoms were fixed to simulate the bulk structure.

The undissociated BPA molecule, which is the predominant species under the experimental conditions, was used in the calculations. To account for the effect of water on the adsorption of BPA (i.e., the polar interactions of water molecules with BPA and with MnO<sub>2</sub>), one water molecule was placed in the systems and was allowed to form hydrogen bonding with BPA, or with the  $\alpha$ -MnO<sub>2</sub> surface. Note that for  $\alpha$ -MnO<sub>2</sub> the bidentate complex on the {100} facets formed with Mn<sub>4c</sub> atoms was selected in the DFT calculations, rather than Mn<sub>5c</sub> atoms, because higher adsorption energy to form monodentate complex was observed between Mn<sub>4c</sub> atoms and the BPA molecules than that of Mn<sub>5c</sub> atoms; similarly, calculations were conducted for the bidentate complex on the {310} facets formed with Mn<sub>3c</sub> atoms, rather than Mn<sub>5c</sub> atoms. The adsorption energies ( $\Delta E_{\text{ads}}$ ) were calculated as follows:

$$\Delta E_{\text{ads}} = E_{\text{slab} + \text{H}_2\text{O} + \text{BPA}} - (E_{\text{slab}} + E_{\text{H}_2\text{O}} + E_{\text{BPA}}) \quad (\text{S1})$$

where  $E_{\text{slab} + \text{H}_2\text{O} + \text{BPA}}$ ,  $E_{\text{slab}}$ ,  $E_{\text{H}_2\text{O}}$ , and  $E_{\text{BPA}}$  are the total energy of the optimized slab model with a H<sub>2</sub>O molecule and a BPA surface complex, the energy of the initial slab model surface, the energy of a H<sub>2</sub>O molecule and the energy of a BPA molecule, respectively.

## Reaction scheme of phenols oxidation by manganese oxides

The oxidation of phenols by manganese oxides includes the following steps:<sup>4</sup>

Precursor complex formation:

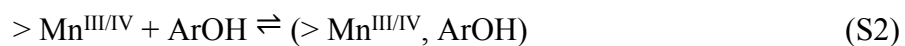

Electron transfer:

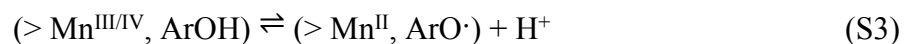

Release of phenoxy radical:

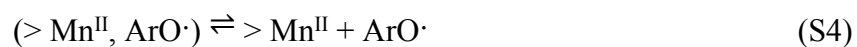

Release of reduced Mn(II):

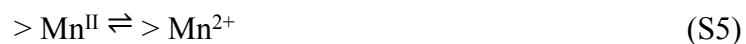

Coupling and further oxidation:

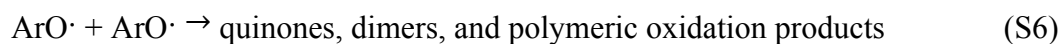

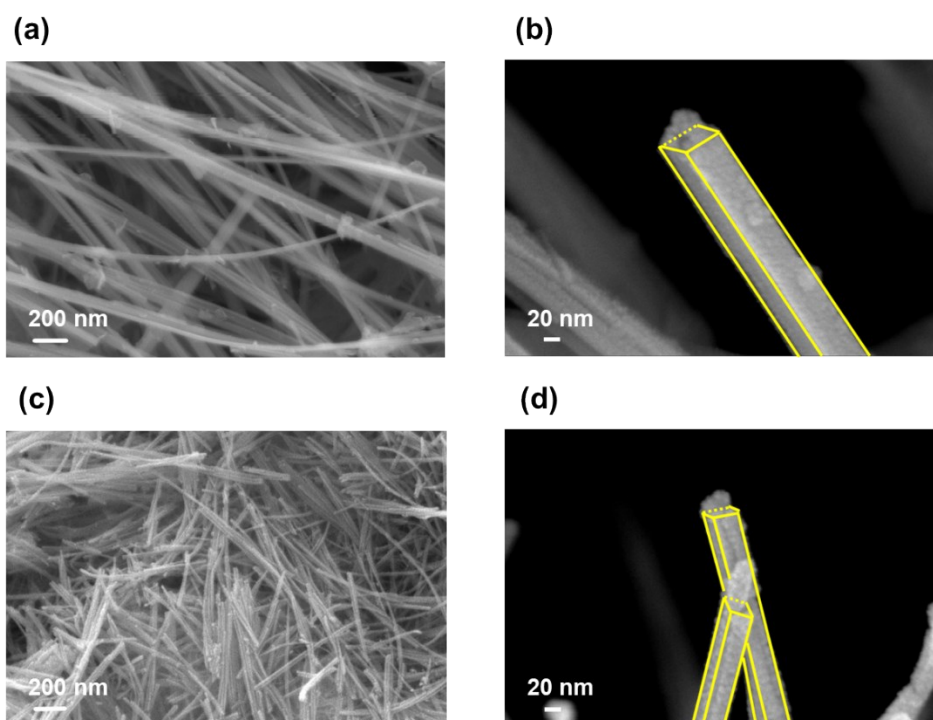

**Fig. S1** SEM images of (a, b)  $\alpha$ -MnO<sub>2</sub>-100 and (c, d)  $\alpha$ -MnO<sub>2</sub>-310.

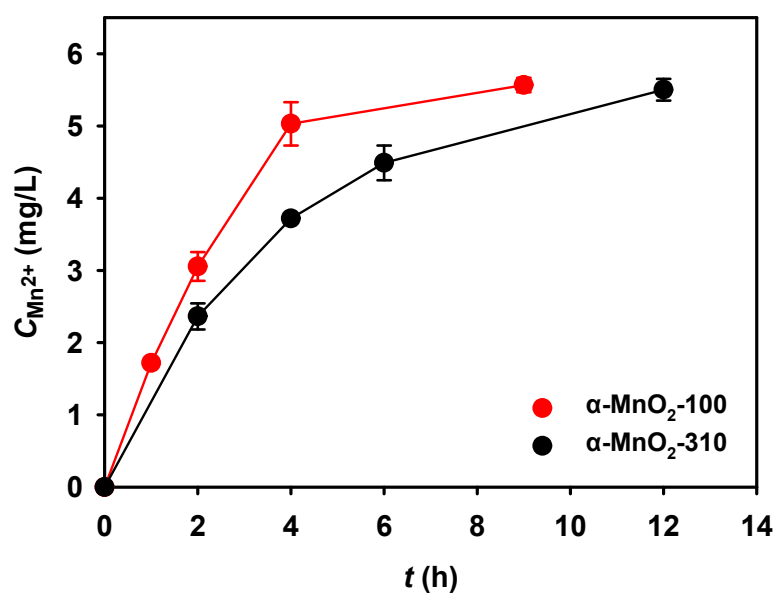

**Fig. S2** Release kinetics of dissolved  $Mn^{2+}$  during the oxidation of BPA by  $\alpha\text{-MnO}_2\text{-100}$  and  $\alpha\text{-MnO}_2\text{-310}$ .  $[BPA]_0 = 10 \text{ mg L}^{-1}$ ,  $[\alpha\text{-MnO}_2]_0 = 35 \text{ mg L}^{-1}$ . Error bars indicate variances of duplicates.

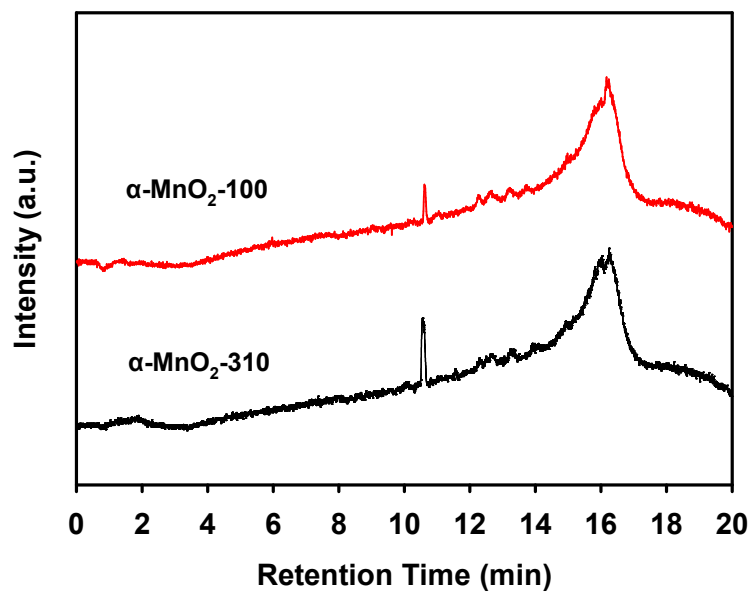

**Fig. S3** Total ion chromatogram (TIC) of BPA and its reaction products by  $\alpha\text{-MnO}_2\text{-100}$  and  $\alpha\text{-MnO}_2\text{-310}$ .

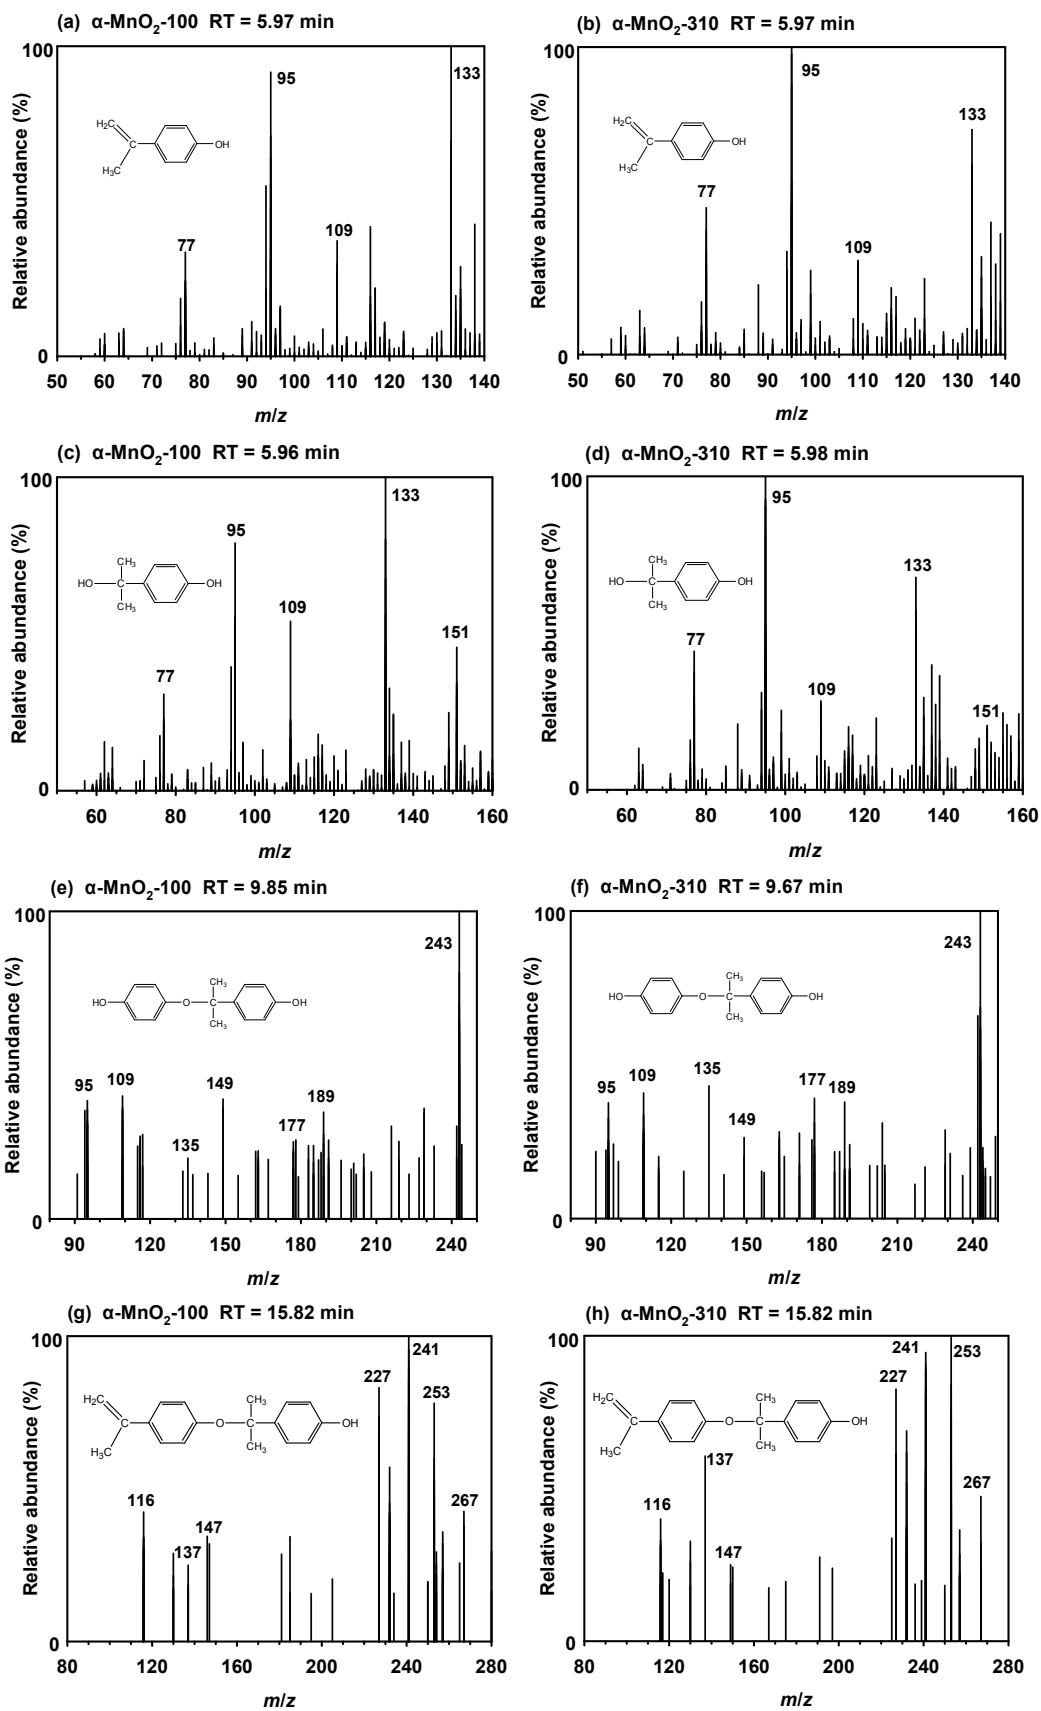



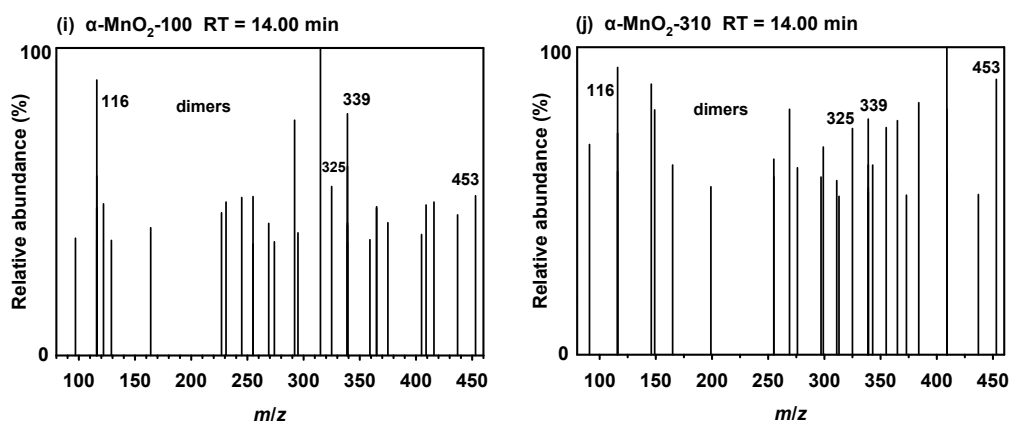

**Fig. S4** Mass spectra of identified BPA reaction products by (a, c, e, g, i)  $\alpha$ -MnO<sub>2</sub>-100 and (b, d, f, h, j)  $\alpha$ -MnO<sub>2</sub>-310, respectively.

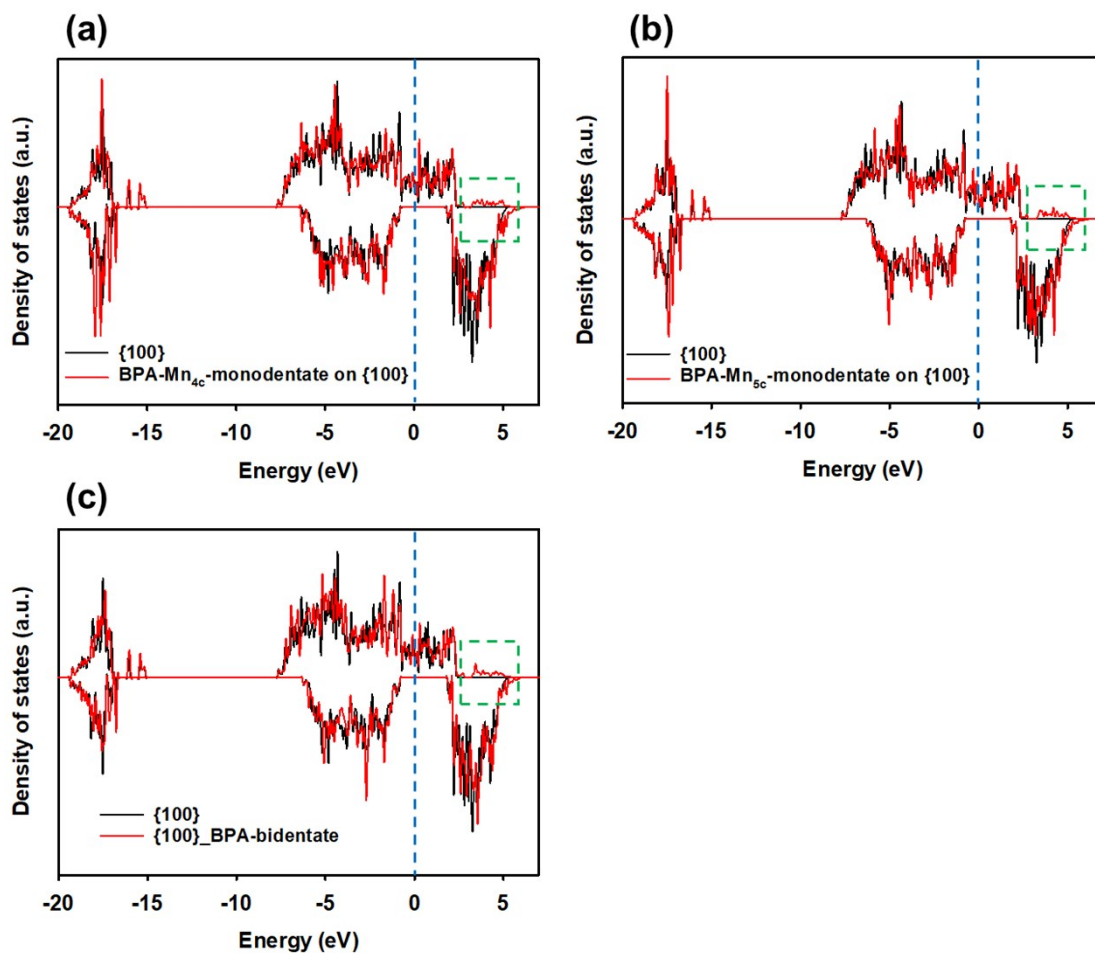

**Fig. S5** Total density of states (TDOS) of  $\alpha$ -MnO<sub>2</sub> surfaces exposed with the {100} facet before and after BPA adsorption in different complexation configurations: (a) monodentate coordination to Mn<sub>4c</sub>, (b) monodentate coordination to Mn<sub>5c</sub>, (c) bidentate coordination. The vertical blue dashed lines represent the Fermi level. New peaks (in green dashed frame) were observed at 2.5-5.0 eV in the valence band (VB) after BPA adsorption, indicating the formation of stable adsorption complexes.

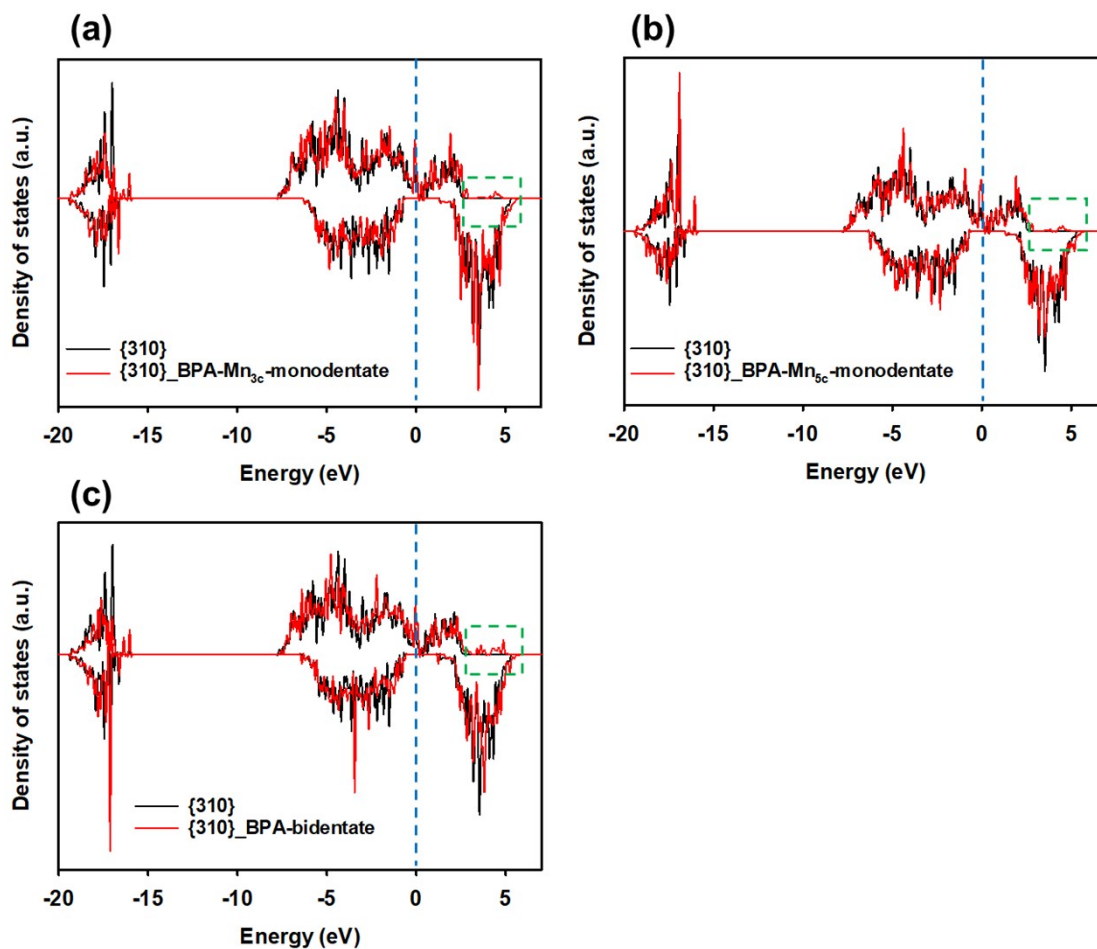

**Fig. S6** Total density of states (TDOS) of  $\alpha$ - $\text{MnO}_2$  surfaces exposed with the  $\{310\}$  facet before and after BPA adsorption in different complexation configuration: (a) monodentate coordination to  $\text{Mn}_{3c}$ , (b) monodentate coordination to  $\text{Mn}_{5c}$ , (c) bidentate coordination. The vertical blue dashed lines represent the Fermi level. New peaks (in green dashed frame) were observed at 2.5-5.0 eV in the valence band (VB) after BPA adsorption, indicating the formation of stable adsorption complexes.

(a) {100} top view

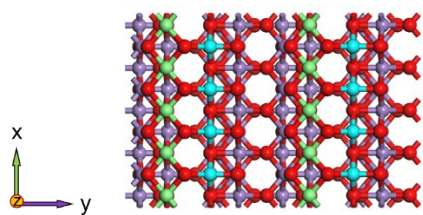

(b) {310} top view

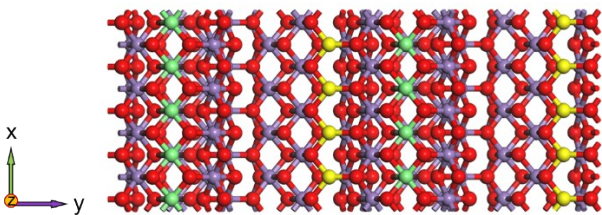

(c) {100} side view

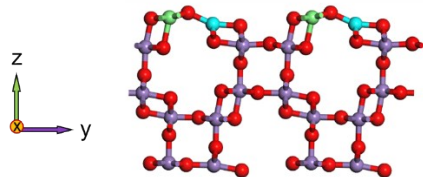

(d) {310} side view

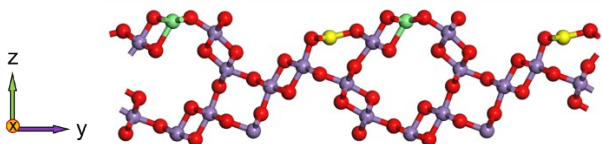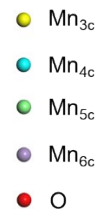

**Fig. S7** (a, b) The top views and (c, d) side views of the atomic arrangement of the {100} and {310} facets of  $\alpha$ -MnO<sub>2</sub>, respectively. Yellow spheres are three-coordinated Mn (Mn<sub>3c</sub>) atoms, blue spheres are four-coordinated Mn (Mn<sub>4c</sub>) atoms, green spheres are five-coordinated Mn (Mn<sub>5c</sub>) atoms, purple spheres are six-coordinated Mn (Mn<sub>6c</sub>) atoms and red spheres are O atoms.

## References

- 1 S. Rong, P. Zhang, F. Liu and Y. Yang, Engineering crystal facet of  $\alpha$ -MnO<sub>2</sub> nanowire for highly efficient catalytic oxidation of carcinogenic airborne formaldehyde, *ACS Catal.*, 2018, **8**, 3435–3446.
- 2 P. E. Blochl, Projector augmented-wave method, *Phys. Rev. B*, 1994, **50**, 17953–17979.
- 3 G. Kresse and D. Joubert, From ultrasoft pseudopotentials to the projector augmented-wave method, *Phys. Rev. B*, 1999, **59**, 1758–1775.
- 4 A. T. Stone, Reductive dissolution of manganese(III/IV) oxides by substituted phenols, *Environ. Sci. Technol.*, 1987, **21**, 979–988.
